# Supplementary material for: Overexpression of Il-6 in Bleomycin-Treated Balb/C Mice Provides a New Model of Lung Fibrosis: Transcriptomic Comparison to Human Ipf
Source: Preprints.org preprint supplement (doi:10.20944/preprints202407.2361.v1), 2024-07-30
Supplement: Supplementary file 5 [file supplementary]

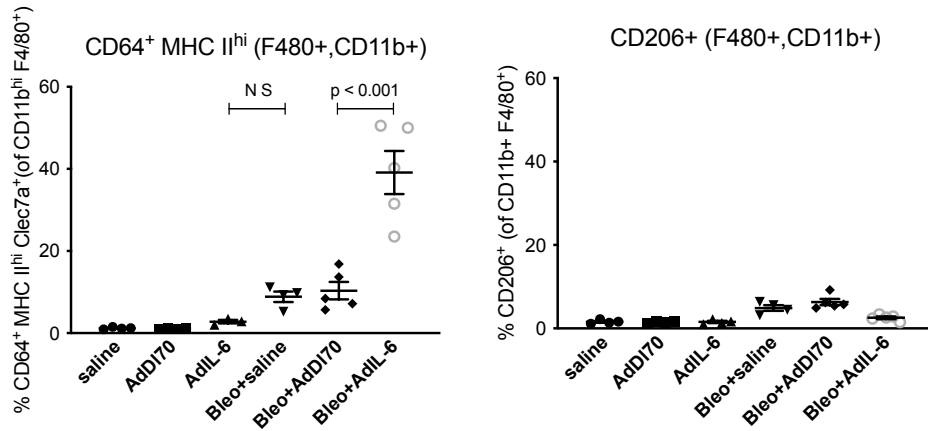

**Supplemental Fig S3: AdIL-6+Bleo induces T cell activation and CD64+MHChi/Clec7a macrophages but not CD206+/CD11b+ alternatively activated Macrophages at Day 7.** BALB/c mice were intubated with saline control and AdDL70 or AdIL-6 alone or in combination with bleomycin (0.03U) for 7 days (n=3-6 mice /group). Flow cytometry strategy is summarized in Fig 4A.
