# Supplementary material for: Overexpression of Il-6 in Bleomycin-Treated Balb/C Mice Provides a New Model of Lung Fibrosis: Transcriptomic Comparison to Human Ipf
Source: Preprints.org preprint supplement (doi:10.20944/preprints202407.2361.v1), 2024-07-30
Supplement: Supplementary file 6 [file supplementary]

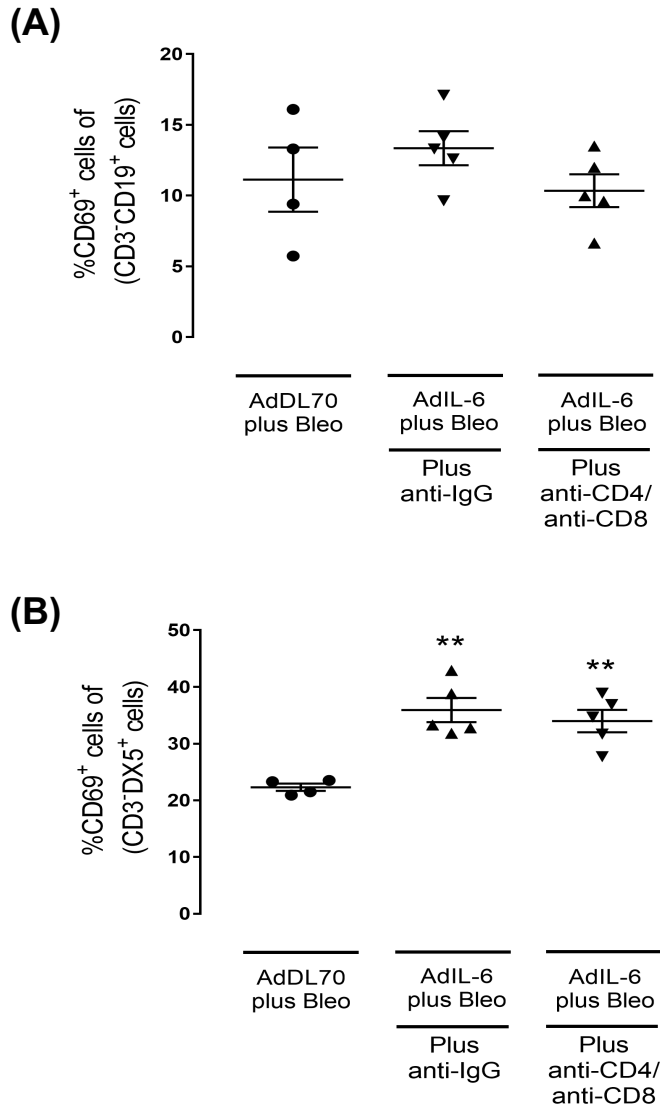

**Supplemental Fig S4: Anti-CD4 plus anti-CD8 antibody does not affect activation of B cells or NK cells.** BALB/c mice were treated with AdDL70+Bleo or AdIL-6+Bleo and with either control antibody or anti-CD4 and CD8 Ab. Flow cytometry was used at day 14 to examine activation (CD69+ percentage) of CD19+ B cells or DX5+ NK cells. \*\*  $p < 0.01$  when compared to AdDL170 + Bleo. Differences were not significant between control antibody and antiCD4/8 treatments.
