# Supplementary material for: Overexpression of Il-6 in Bleomycin-Treated Balb/C Mice Provides a New Model of Lung Fibrosis: Transcriptomic Comparison to Human Ipf
Source: Preprints.org preprint supplement (doi:10.20944/preprints202407.2361.v1), 2024-07-30
Supplement: Supplementary file 7 [file supplementary]

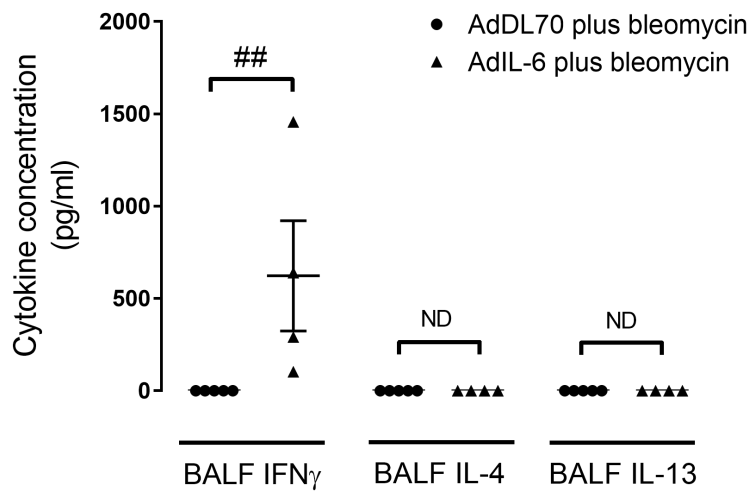

**Supplementary fig S2. Levels of IFN , IL-4 and IL-13 in the bronchoalveolar lavage fluid of Balb/c mice following AdDL70 or AdIL-6 in combination with Bleomycin.** BALB/c mice were intubated with AdDL70 or AdIL-6, alone or in combination with bleomycin (0.03U) for 7 days (n=3 mice /group). Levels of cytokines were assessed by ELISA. Statistics completed using One-way ANOVA and Newman-Keuls post-hoc analysis, where ## is  $p < 0.01$  compared to AdDL70+Bleo control.
