# Supplementary material for: Overexpression of Il-6 in Bleomycin-Treated Balb/C Mice Provides a New Model of Lung Fibrosis: Transcriptomic Comparison to Human Ipf
Source: Preprints.org preprint supplement (doi:10.20944/preprints202407.2361.v1), 2024-07-30
Supplement: Supplementary file 8 [file supplementary]

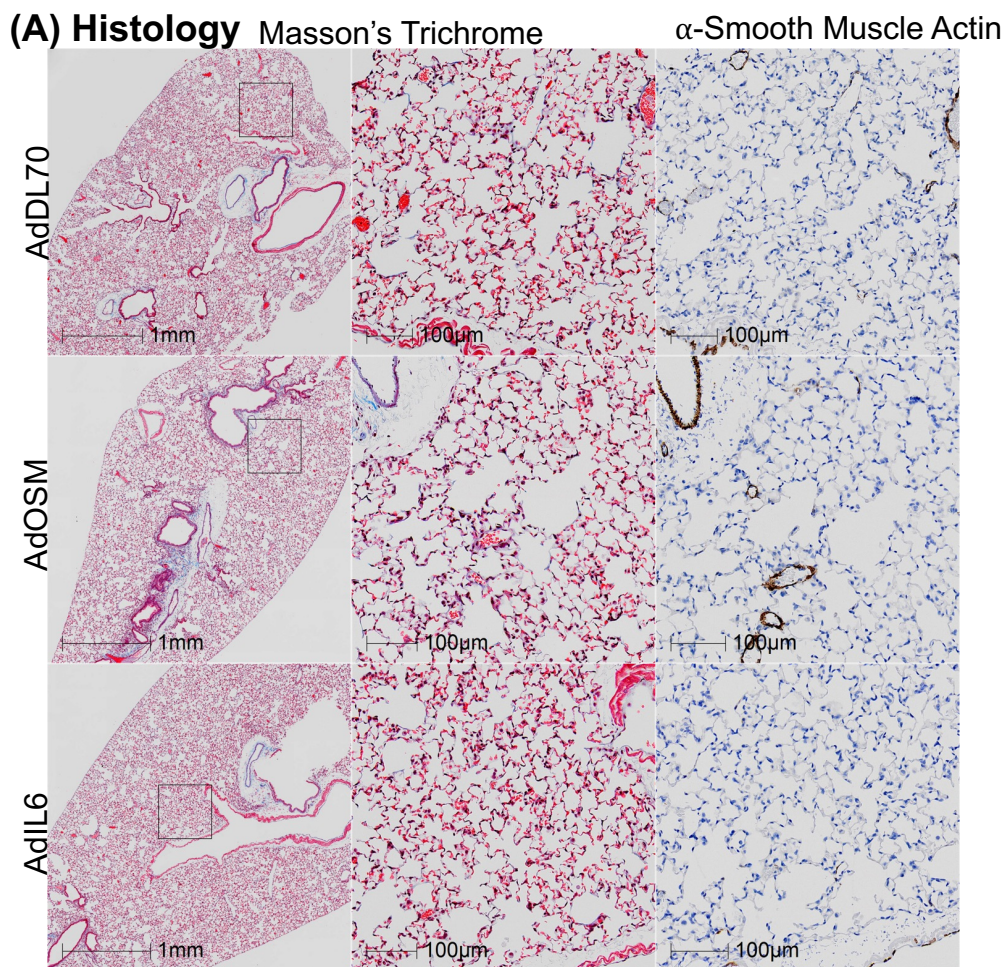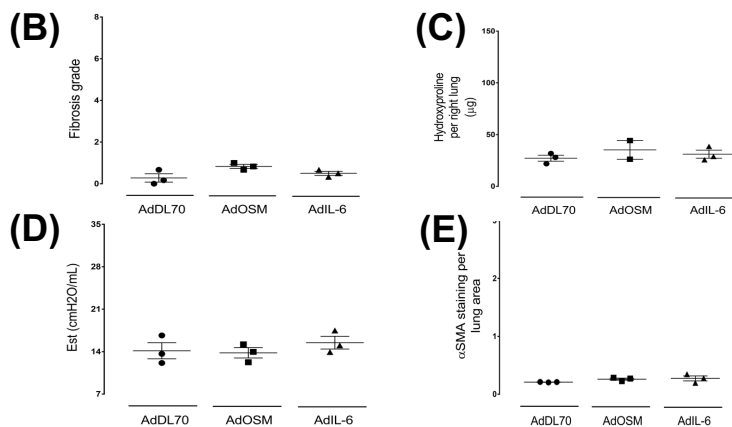

**Supplementary Fig. S1B** *Adectors alone do not induce fibrosis at 21 days.* Female BALB/c mice received  $2 \times 10^7$  PFU/ mouse as in Fig 1 but of AdDL70, AdOSM or IL-6 alone. A) Representative images of histological serial sections of lung parenchyma stained with Masson's Trichrome (Left and middle panels), or ASMA (right panels). B) Quantification of fibrotic score (Ashcroft), C) Hydroxyproline per right lung. (D) Quasistatic Elastance (Est) derived on PV-loops (flexiVent), (E) Quantification of ASMA immunohisto-staining (3 mice per group) Difference between groups were compared using Dunnett's non-parametric ANOVA, however no significant difference was observed between groups
