# Supplementary material for: Overexpression of Il-6 in Bleomycin-Treated Balb/C Mice Provides a New Model of Lung Fibrosis: Transcriptomic Comparison to Human Ipf
Source: Preprints.org preprint supplement (doi:10.20944/preprints202407.2361.v1), 2024-07-30
Supplement: Supplementary file 9 [file supplementary]

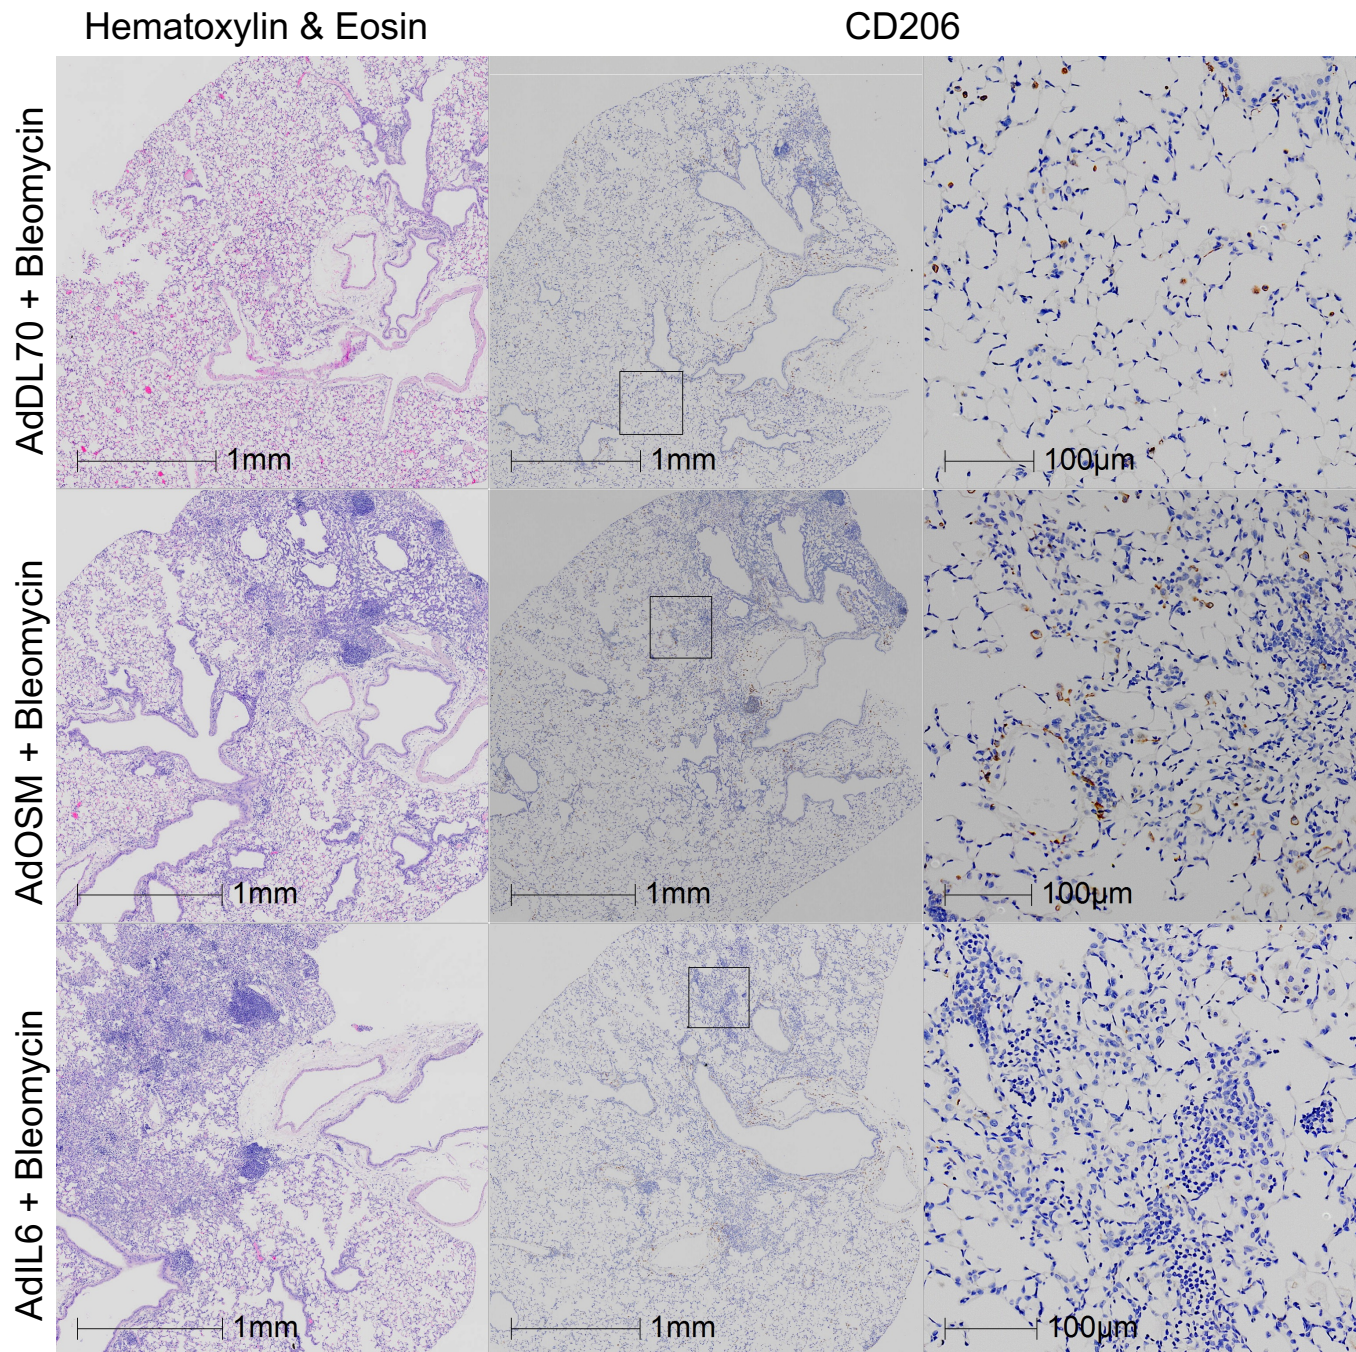

**Supplementary Fig. S1A. Day 21 histological staining with H&E and CD206 immunostaining.** Female BALB/c mice received  $2 \times 10^7$  PFU/ mouse as in Fig 1 (AdDL70+Bleo, AdOSM+Bleo, AdIL-6+Bleo) and examined at day 21 (3 mice per group). Representative images of histological serial sections of lung parenchyma stained with H&E (Left panels, low power) and immunostaining for CD206 (middle low power and right panels high power). Brown signals are CD206+.
