# Supplementary material for: Overexpression of Il-6 in Bleomycin-Treated Balb/C Mice Provides a New Model of Lung Fibrosis: Transcriptomic Comparison to Human Ipf
Source: Preprints.org preprint supplement (doi:10.20944/preprints202407.2361.v1), 2024-07-30
Supplement: Supplementary file 10 [file supplementary]

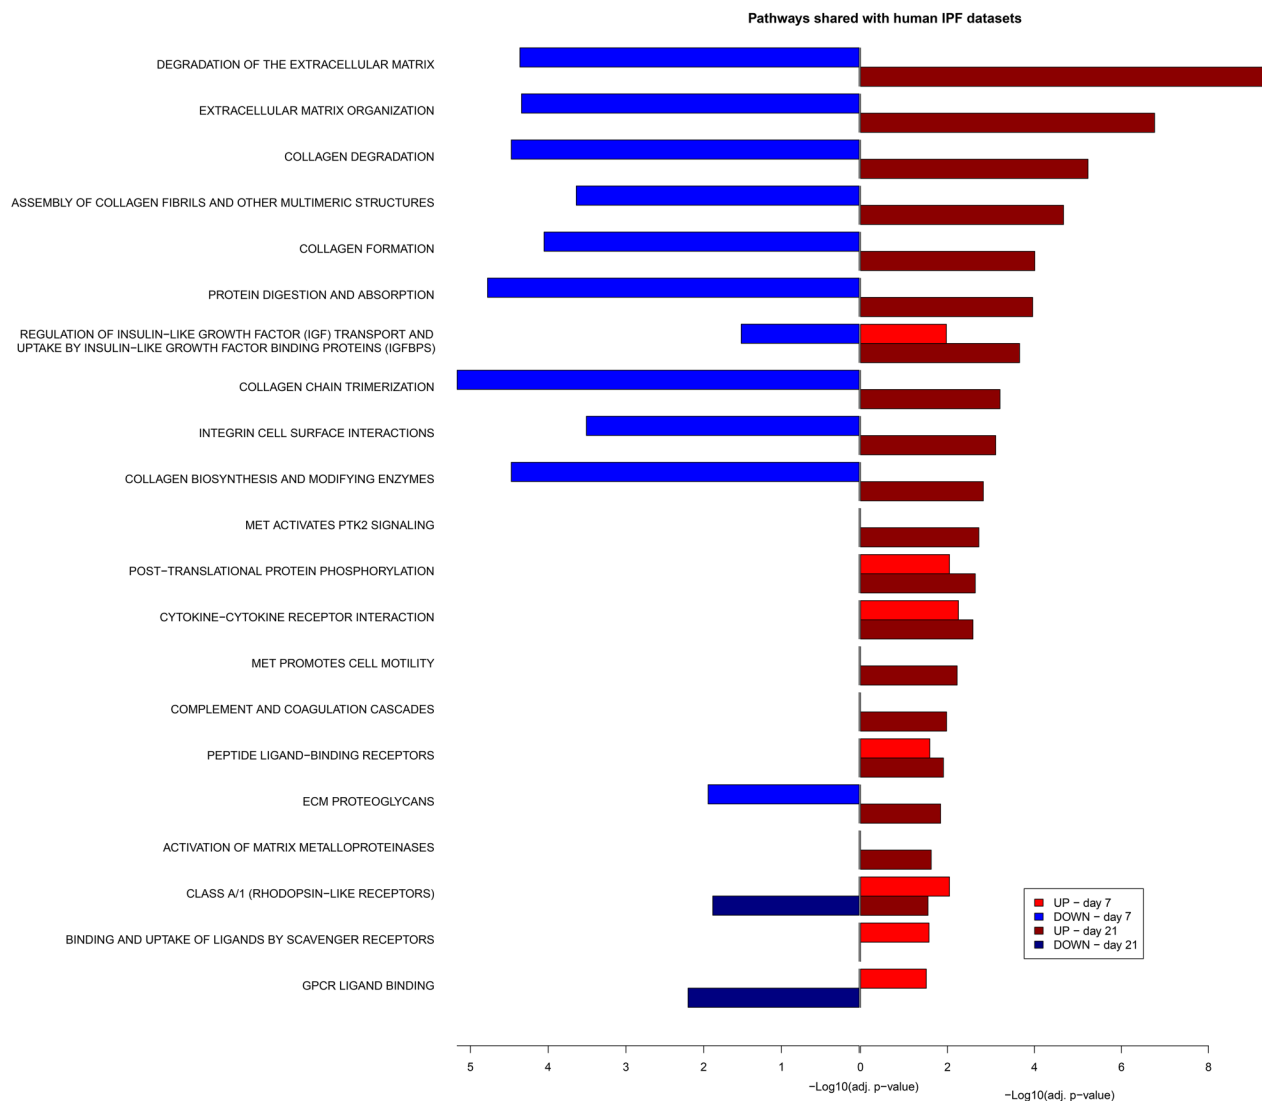

### Supplementary Fig S5. Shared pathways between AdIL-6+Bleo and IPF

**transcriptomes.** Pathways shared between human IPF datasets and AdIL-6+Bleo transcriptomes at Day 7 and Day 21 were determined using STRING database as in Methods. Pathways up at Day 7 are shown in red, up at day 21 are shown in maroon. Pathways down at 7 are shown in blue, and down at Day 21 are shown in dark blue.
